# Supplementary material for: Restoration of histone acetylation ameliorates disease and metabolic abnormalities in a FUS mouse model
Source: PubMed Central journal article supplement (PMC6612190; doi:10.1186/s40478-019-0750-2), 2019-07-05

**A**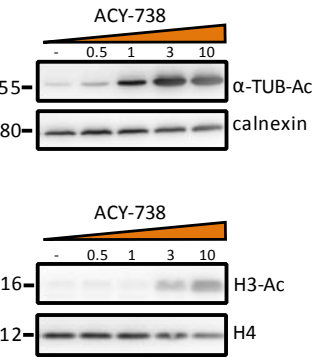**B**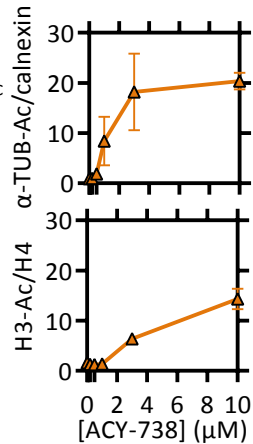**C**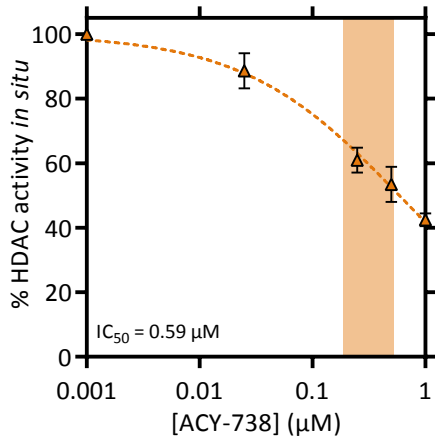**D**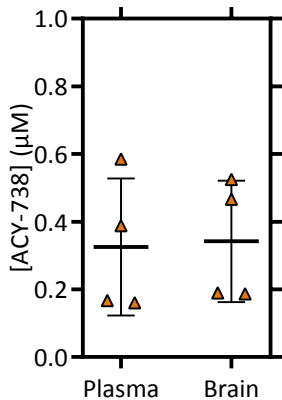

Supplement: 40478_2019_750_MOESM2_ESM.pdf [file 40478_2019_750_MOESM2_ESM.pdf]
