# Supplementary material for: Restoration of histone acetylation ameliorates disease and metabolic abnormalities in a FUS mouse model
Source: Springer Nature journal article supplement (doi:10.1186/s40478-019-0750-2), 2019-07-05

**A****ACY-738**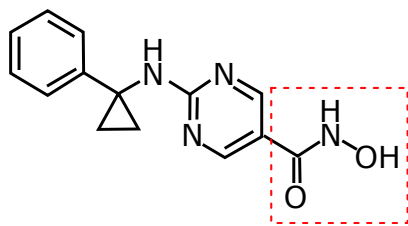**ACY-1090**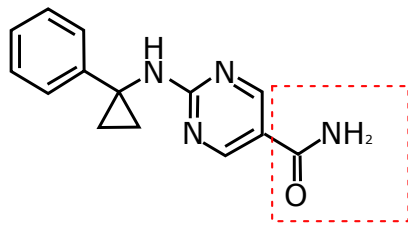**B**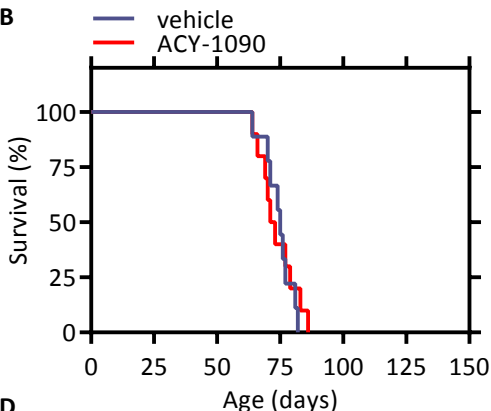**C**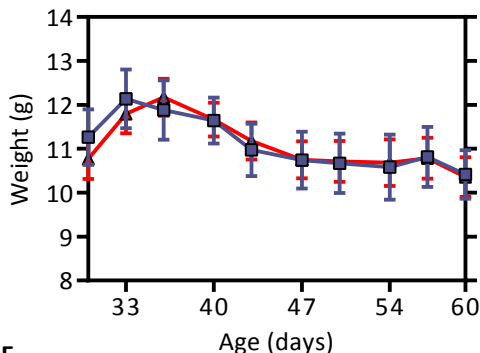**D**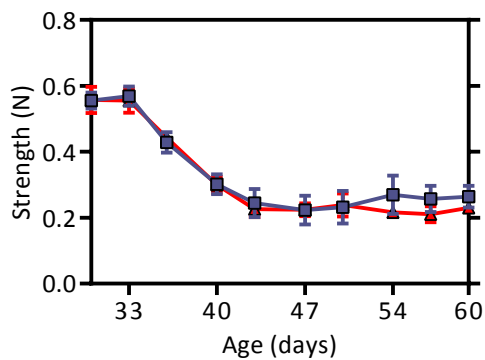**E**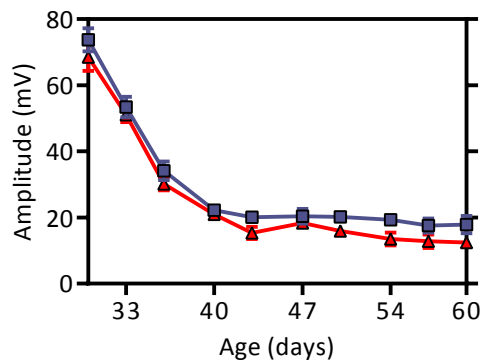

Supplement: MOESM4 [file 25666818]
