# Supplementary material for: Restoration of histone acetylation ameliorates disease and metabolic abnormalities in a FUS mouse model
Source: Springer Nature journal article supplement (doi:10.1186/s40478-019-0750-2), 2019-07-05

TRANSCRIPTOMICS

PROTEOMICS

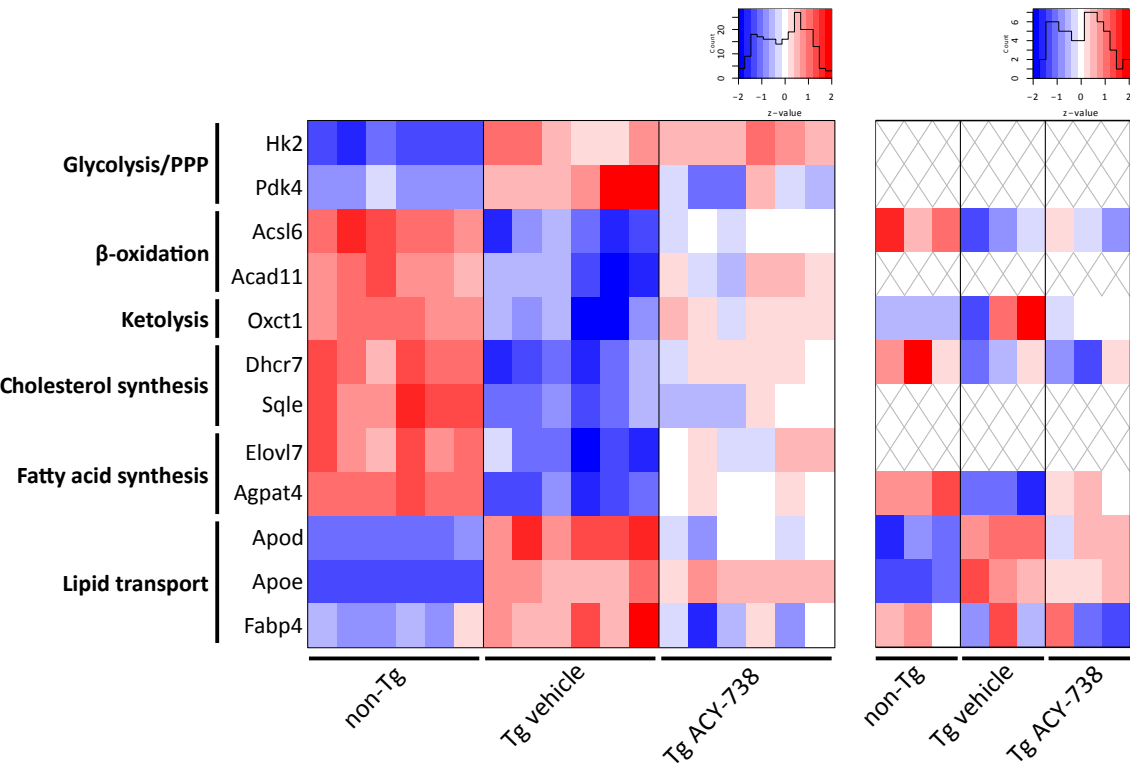

Supplement: MOESM7 [file 25666818]
